# Supplementary material for: Three-dimensional label-free imaging and quantification of lipid droplets in live hepatocytes
Source: PubMed Central journal article supplement (PMC5118789; doi:10.1038/srep36815), 2016-11-22
Supplement: srep36815-s5.pdf [file srep36815-s5.pdf]

## Supplementary Information

### Three-dimensional label-free imaging and quantification of lipid droplets in live hepatocytes

Kyoo Hyun Kim<sup>1</sup>, Seo Eun Lee<sup>1,†</sup>, Jonghee Yoon<sup>1</sup>, Ji Han Heo<sup>1,‡</sup>, Chulhee Choi<sup>2</sup>, and YongKeun Park<sup>1,3,\*</sup>

<sup>1</sup>Department of Physics, Korea Advanced Institute of Science and Technology, Daejeon 34141, Republic of Korea.

<sup>2</sup>Department of Bio and Brain Engineering, Korea Advanced Institute of Science and Technology, Daejeon 34141, Republic of Korea.

<sup>3</sup>TOMOCUBE, Inc., Daejeon 34051, Republic of Korea

<sup>†</sup>Present address: Graduate School of Arts and Sciences, Columbia University, NY 10032, USA

<sup>‡</sup>Present address: College of Medicine, Seoul National University, Seoul 03080, Republic of Korea

\*Correspondence:

Prof. YongKeun Park,

E-mail: [yk.park@kaist.ac.kr](mailto:yk.park@kaist.ac.kr),

Tel: +82-42-350-2514, Fax: +82-42-350-2510

#### Descriptions for supplementary movies

##### Supplementary movies:

###### Supplementary Movie 1

The 3-D rendered isosurface image of 3-D RI distribution of a Huh-7 cell from various viewing angles.

###### Supplementary Movie 2

The 3-D rendered isosurface image of 3-D RI distribution of an untreated Huh-7 cell from various viewing angles.

###### Supplementary Movie 3

The 3-D rendered isosurface image of 3-D RI distribution of an oleic acid treated Huh-7 cell from various viewing angles.

###### Supplementary Movie 4

The time-lapse 3-D rendered isosurface images of 3-D RI distribution of a hepatocyte. Each frame of 3-D RI distribution was measured every 3 seconds for 93 seconds.

###### Supplementary Figure 1

The distribution of RI contrast values in the background region.

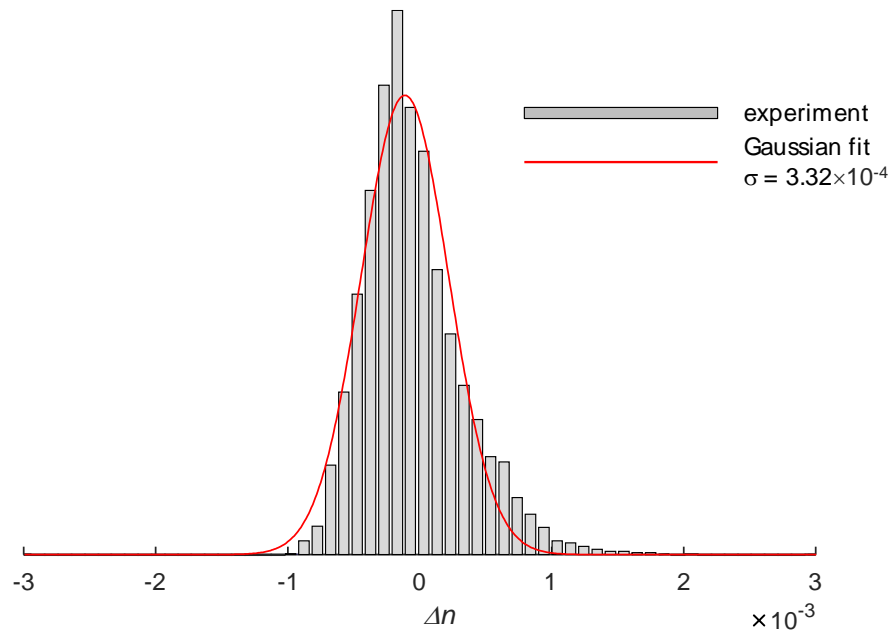

Supplementary Figure 1. The distribution of RI contrast values in the background region. The solid red line indicates a Gaussian fit with the standard deviation of  $3.32 \times 10^{-4}$ .
